# Supplementary material
Source: PubMed Central journal article supplement (PMC4965312)

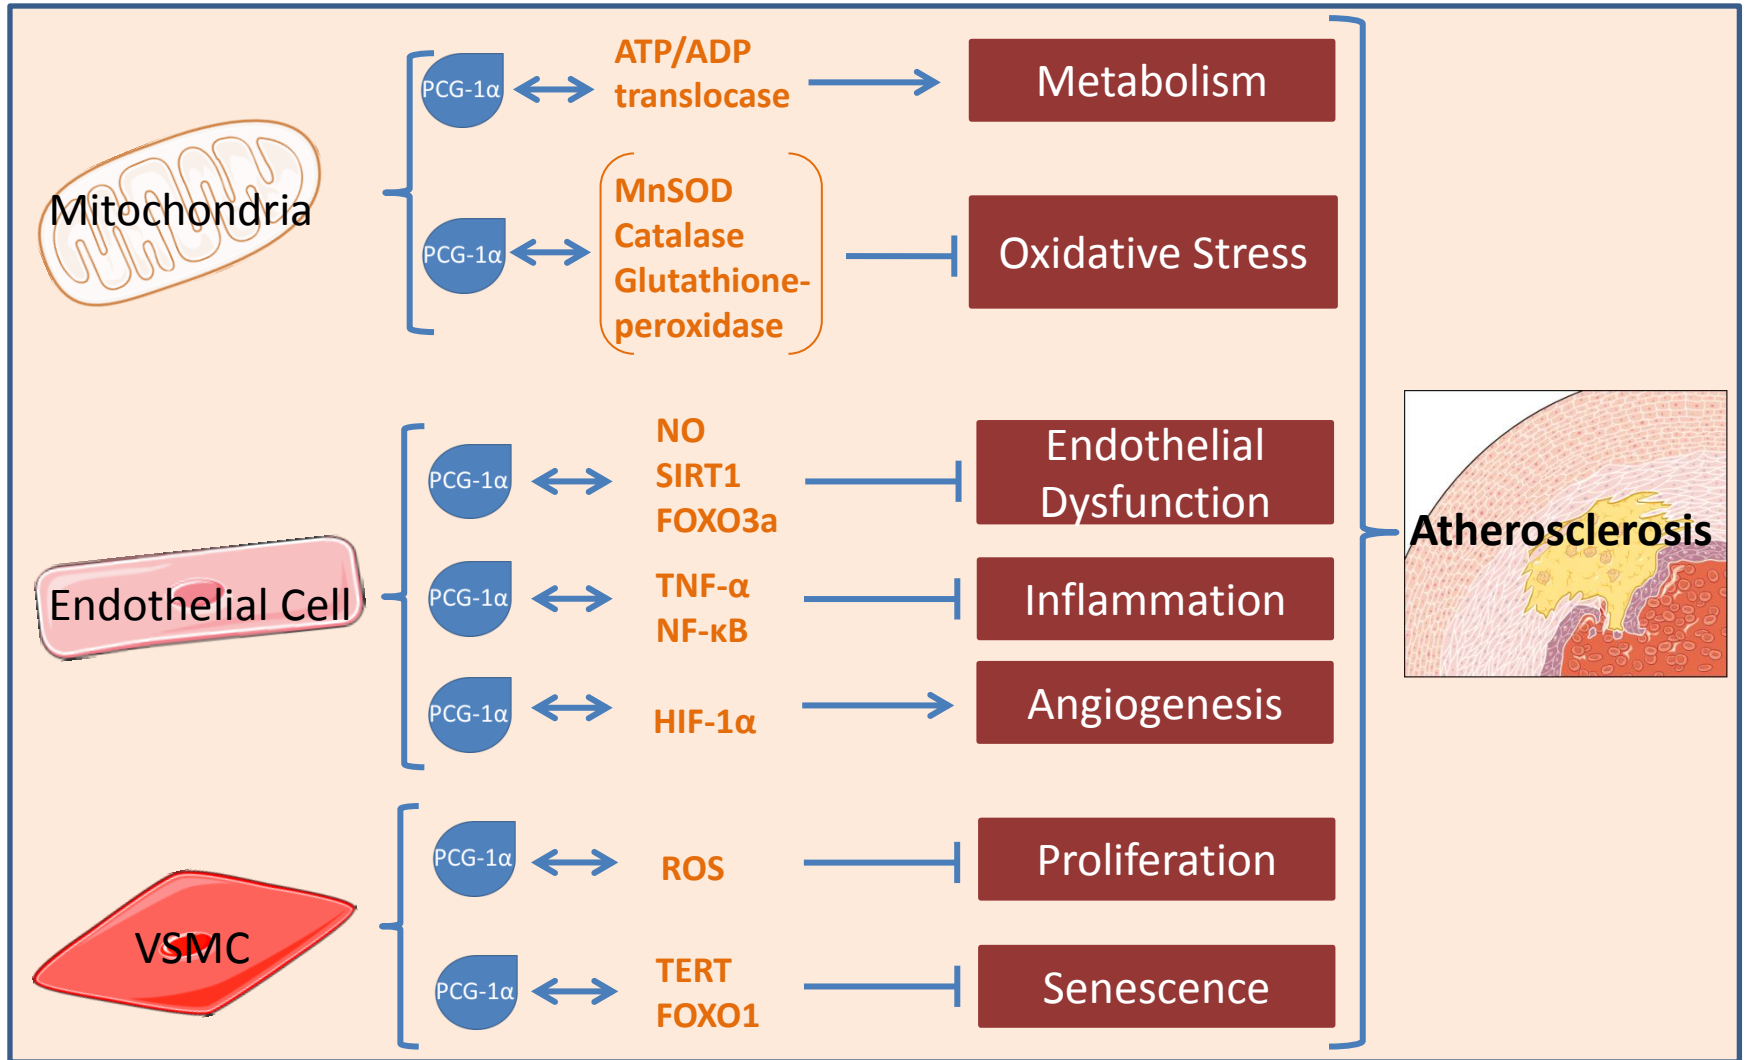

Supplement: NIHMS793145-supplement-Legacy_Supplemental_File.pdf [file NIHMS793145-supplement-Legacy_Supplemental_File.pdf]
